# Supplementary material for: The role of grain growth in controlling the crystal orientation of Sb2S3 films for efficient solar cells
Source: Royal Society of Chemistry journal article supplement (doi:10.1039/d3ta00678f), 2023-01-01
Supplement: d3ta00678f1.pdf [file d3ta00678f1.pdf]

## Supplementary Information

### **Role of Grain Growth in Controlling the Crystal Orientation of Sb<sub>2</sub>S<sub>3</sub> Film for efficient Solar Cell**

Chunyan Wu<sup>a†\*</sup>, Lijian Zhang<sup>bc†</sup>, Bo Che<sup>c</sup>, Peng Xiao<sup>c</sup>, Junjie Yang<sup>c</sup>, Haolin Wang<sup>c</sup>, Liang Chu<sup>b</sup>, Wensheng Yan<sup>b\*</sup>, and Tao Chen<sup>c\*</sup>

<sup>a</sup>Laboratory of Advanced Nano-Optoelectronic Materials and Devices, Ningbo Institute of Materials Technology and Engineering, Chinese Academy of Science, Ningbo, Zhejiang, 315201, People's Republic of China.

<sup>b</sup>Institute of Carbon Neutrality and New Energy, School of Electronics and Information, Hangzhou Dianzi University, Hangzhou, 310018, People's Republic of China.

<sup>c</sup>Hefei National Research Center for Physical Sciences at the Microscale, CAS Key Laboratory of Materials for Energy Conversion, Department of Materials Science and Engineering, School of Chemistry and Materials Science, University of Science and Technology of China, Hefei, Anhui, 230026, People's Republic of China.

These authors contributed equally to this work

\*Corresponding Authors:

E-mail: wuchunyan@nimte.ac.cn; wensheng.yan@hdu.edu.cn; tchenmse@ustc.edu.cn

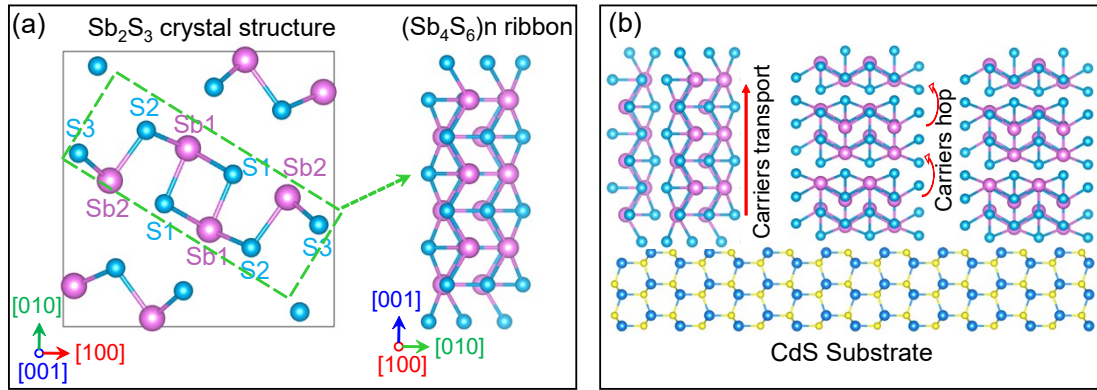

Figure S1. (a) The crystal structure of  $\text{Sb}_2\text{S}_3$  and  $(\text{S}_4\text{S}_6)_n$  ribbon. (b) Schematic diagram showing the photogenerated carriers transport in solar cell with horizontally- $[\text{hk}0]$  or vertically- $[\text{hk}1]$  oriented  $\text{Sb}_2\text{S}_3$ .

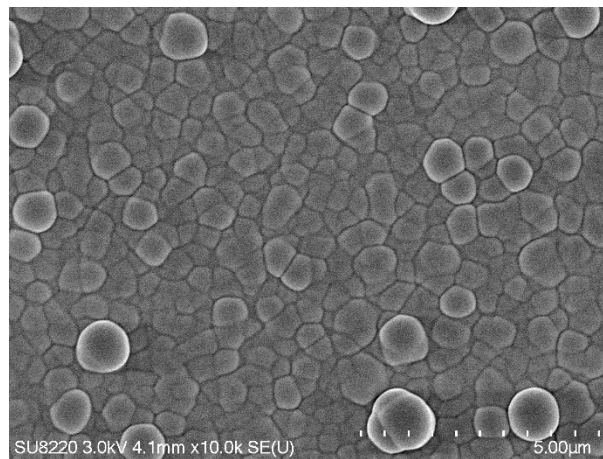

Figure S2. SEM surface image of the precursor  $\text{Sb}_2\text{S}_3$  film without annealing treatment.

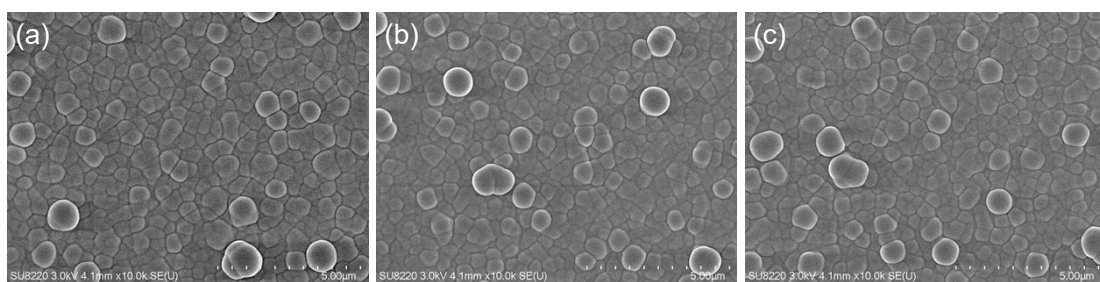

Figure S3. SEM surface images of  $\text{Sb}_2\text{S}_3$  were removed from the hotplate at the temperature of (a) 150  $^\circ\text{C}$ , (b) 200  $^\circ\text{C}$ , and (c) 250  $^\circ\text{C}$ .

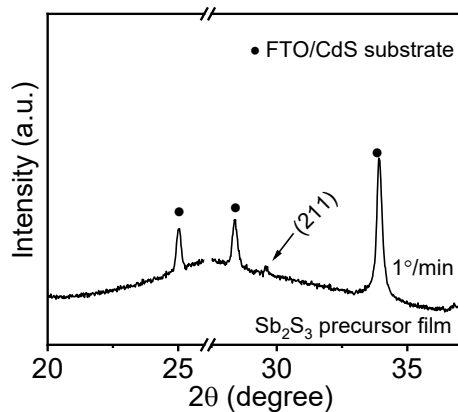

Figure S4. The XRD pattern of the precursor  $\text{Sb}_2\text{S}_3$  film with the XRD measurement at the scan speed of  $1^\circ/\text{min}$ .

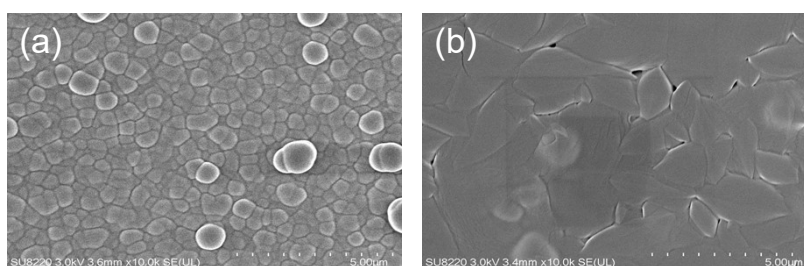

Figure S5. SEM surface images of the precursor  $\text{Sb}_2\text{S}_3$  was directly annealed at  $300^\circ\text{C}$  for (a) 10 S and (b) 20 S.

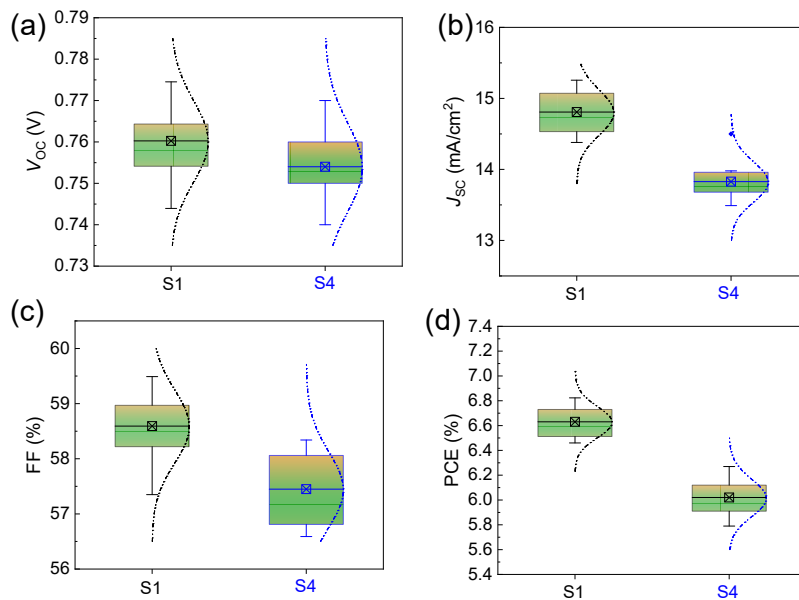

Figure S6. Statistic parameters of (a)  $V_{\text{oc}}$ , (b)  $J_{\text{sc}}$ , (c) FF, and (d) PCE obtained from 10 devices based on S1 and S4 films.

Table S1. Texture ecoefficiency of (120), (220), (130), (211), and (221) for each sample.

| $\square$      | S1       | S2       | S3       | S4       |
|----------------|----------|----------|----------|----------|
| $\square(120)$ | 0.638604 | 0.686054 | 0.950391 | 1.136597 |
| $\square(220)$ | 0.914345 | 0.903854 | 1.423648 | 1.722235 |
| $\square(130)$ | 0.739076 | 0.742605 | 0.787764 | 0.954708 |
| $\square(211)$ | 1.431874 | 1.444875 | 0.94301  | 0.532435 |
| $\square(221)$ | 1.272573 | 1.226141 | 0.895186 | 0.654025 |

Table S2. The detail parameters of the biexponential fitting of TAS decay.

| Sample | $A_1$ | $t_1$ (ps) | $A_2$ | $t_2$ (ps) | $t_{ave}$ (ps) |
|--------|-------|------------|-------|------------|----------------|
| S1     | 0.26  | 180        | 0.74  | 3984       | 3924           |
| S4     | 0.15  | 239        | 0.85  | 4858       | 4818           |

Table S3. The trap energy level ( $E_T$ ), cross section ( $\sigma$ ), level deep defect concentration ( $N_T$ ), and defect type in S1 and S4 films.

| Sample | level | $E_V$ (eV)  | Sigma ( $\text{cm}^2$ ) | $N_T$ ( $\text{cm}^{-3}$ ) |          |
|--------|-------|-------------|-------------------------|----------------------------|----------|
| S1     | H2    | $E_V+0.702$ | $2.21*10^{-15}$         | $1.42*10^{14}$             | $S_{sb}$ |
| S4     | H1    | $E_V+0.576$ | $2.52*10^{-17}$         | $6.67*10^{13}$             | $V_{sb}$ |
|        | H2    | $E_V+0.701$ | $4.37*10^{-16}$         | $1.08*10^{14}$             | $S_{sb}$ |

### Note S1: Background of DLTS measurement <sup>[1]</sup>

Here we conducted deep-level transient spectroscopy (DLTS) to detect the defect

properties. The activation energy ( $E_a$ ) as well as capture cross-section( $\sigma$ ) of defects can be calculated from Arrhenius plots based on the following equations:

$$\ln(\tau_e v_{th,n} N_C) = \frac{E_C - E_T}{k_B T} - \ln(X_n \sigma_n) \quad (1)$$

$$\ln(\tau_e v_{th,p} N_V) = \frac{E_T - E_V}{k_B T} - \ln(X_p \sigma_p) \quad (2)$$

where  $\tau_e$  represents the emission time constant,  $v_{th,n}$  and  $v_{th,p}$  are the thermal velocities associated with electron and hole traps,  $N_C$  and  $N_V$  are the effective densities of states of conduction ( $E_C$ ) and valence( $E_V$ ) bands,  $X_n$  and  $X_p$  are the entropy factor of hole and electron,  $\sigma_n$  and  $\sigma_p$  represent the capture cross-section of electron and hole traps, respectively.  $T$  and  $k_B$  are the temperature and Boltzmann constant, respectively.  $E_T$  is the energy level of defect. Additionally,  $v_{th,n}$  and  $N_C$  can be obtained from equation (3) and (4):

$$v_{th,n} = \sqrt{\frac{3k_B T}{m_n^*}} \quad (3)$$

$$N_c = 2 \left( \frac{2\pi m_n^* k_B T}{h^2} \right)^{\frac{3}{2}} \quad (4)$$

where  $m_n^*$  is the effective mass for electrons, with similar equations for  $v_{th,p}$  and  $N_V$ . We obtain the activation energy of electron ( $E_C - E_T$ ) and hole ( $E_T - E_V$ ) traps from the slope of equations (1) and (2) through linear regression. The  $\sigma_p$  and  $\sigma_n$  values can be extracted from the intersection of line with y-axis. The trap concentration ( $N_T$ ) can be obtained from equation (5):

$$N_T = 2N_S \frac{\Delta C}{C_R} \quad (5)$$

$N_T$  is the trap concentration.  $N_S$  represents the shallow dopant concentration in the films.  $C_R$  and  $\Delta C$  represent the capacitance at reverse bias in equilibrium and the amplitude of capacitance transient, respectively.

## Reference

[1] R. Tang, X. Wang, W. Lian, J. Huang, Q. Wei, M. Huang, Y. Yin, C. Jiang, S. Yang, G. Xing, S. Chen, C. Zhu, X. Hao, M. A. Green, T. Chen, *Nat. Energy* **2020**, *5*, 587.
